# Supplementary material
Source: PubMed Central journal article supplement (PMC3166206)
Supplement: Supp_Data.pdf [file Supp_Data.pdf]

## Supplementary Data

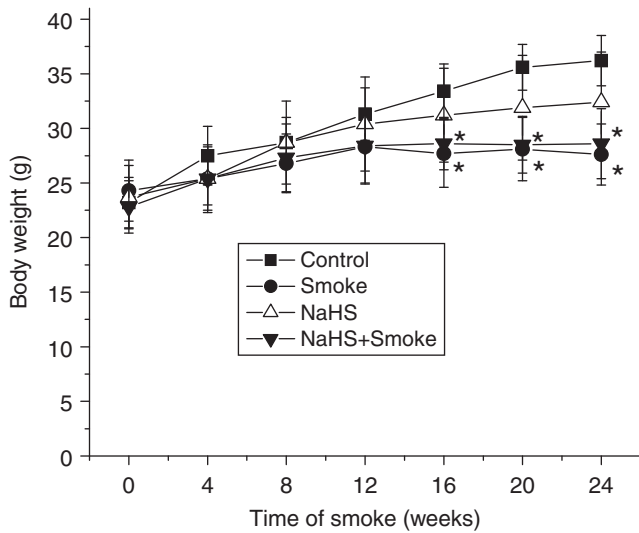

**SUPPLEMENTARY FIG. S1. Effect of tobacco smoke and NaHS on body weight gain.** Mice were injected daily for vehicle or NaHS 30 min before exposed to tobacco smoke for 1h/day, 5 days/week for 24 weeks. Body weights were measured every 4 weeks. Results are expressed as mean  $\pm$  SE;  $n=8-16$  experiments. \* $p<0.05$  versus control group. NaHS, sodium hydrosulfide.

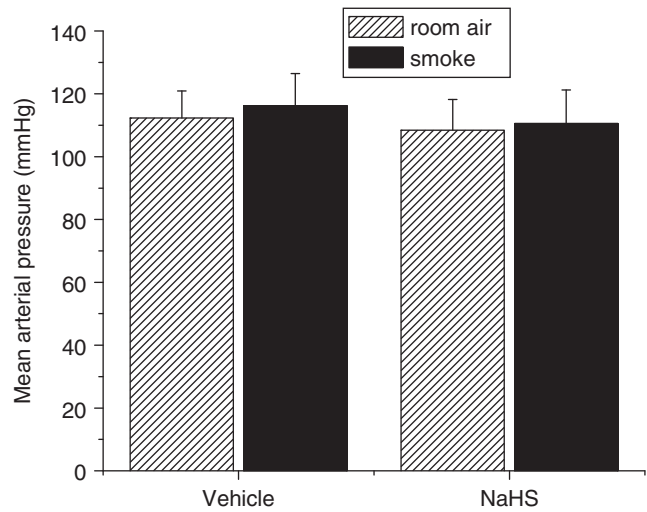

**SUPPLEMENTARY FIG. S2. Effect of tobacco smoke and NaHS on mean arterial pressure.** Mice were injected daily for vehicle or NaHS 30 min before exposed to tobacco smoke for 1h/day for 5 days after which mean arterial blood pressure was measured as described in the Materials and Methods section. Results are expressed as mean  $\pm$  SE;  $n=5$  experiments.

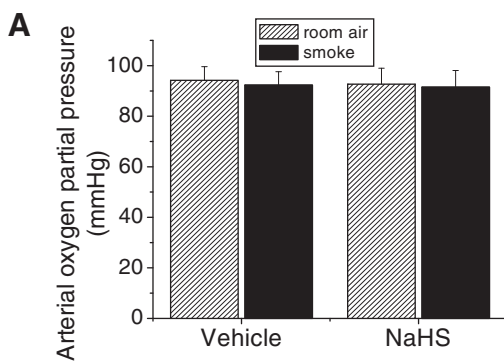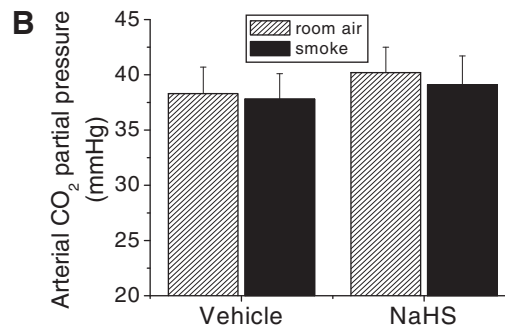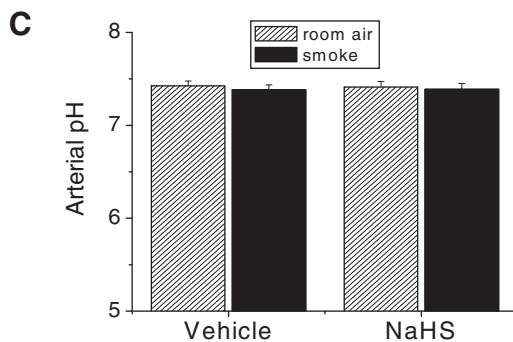

**SUPPLEMENTARY FIG. S3. Effect of tobacco smoke and NaHS on arterial blood gases.** Mice were injected daily for vehicle or NaHS 30 min before exposed to tobacco smoke for 1h/day for 5 days after which arterial blood gases was measured as described in the Materials and Methods section. Results are expressed as mean  $\pm$  SE;  $n=5$  experiments.

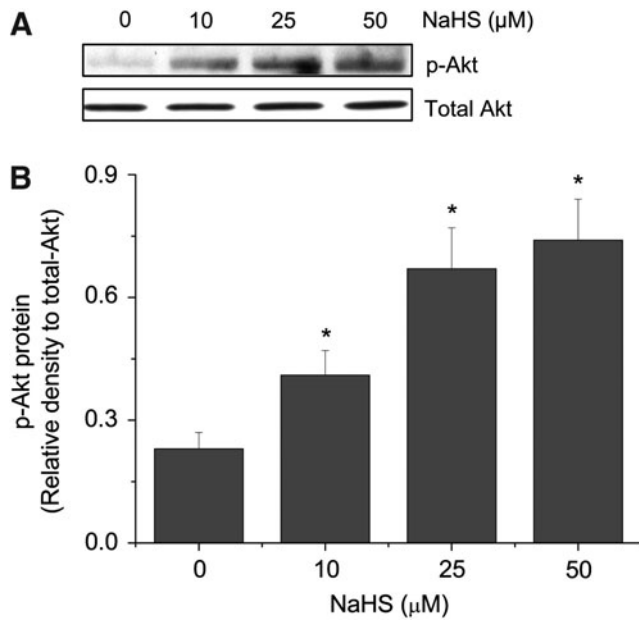

**SUPPLEMENTARY FIG. S4. NaHS increases Akt phosphorylation in endothelial cells.** Bovine pulmonary artery endothelial cells were incubated with or without NaHS (10–50  $\mu\text{M}$ ) for 30 min after which the protein contents of p<sup>ser473</sup>-Akt and total Akt were determined using Western blot analysis. **(A)** Representative blots of three separate experiments. **(B)** Bar graphs depicting the changes in p-Akt protein. Results are expressed as mean  $\pm$  SE;  $n=3$  experiments. \* $p < 0.05$  versus control (0).
